# Supplementary material for: Comparative effectiveness of silvicultural interventions for increasing timber production and sustaining conservation values in natural tropical production forests. A systematic review protocol
Source: Springer Nature journal article supplement (doi:10.1186/s13750-015-0034-7), 2015-03-20
Supplement: MOESM1 [file 13750_2015_34_MOESM1_ESM.docx]

**Additional file 1: Annex1 Reference list to test search comprehensiveness**

Aguilar-Amuchastegui, Naikoa, and Geoffrey M. Henebry. "Assessing Sustainability Indicators for Tropical Forests: Spatio-Temporal Heterogeneity, Logging Intensity, and Dung Beetle Communities." *Forest Ecology and Management* 253, no. 1 (2007): 56-67.

Akutsu, Kosuke, Chey Vun Khen, and Masanori J. Toda. "Assessment of Higher Insect Taxa as Bioindicators for Different Logging-Disturbance Regimes in Lowland Tropical Rain Forest in Sabah, Malaysia." *Ecological research* 22, no. 4 (2007): 542-50.

Alder, Denis, and J. N. M. Silva. "An Empirical Cohort Model for Management of< I> Terra</I>< I> Firme</I> Forests in the Brazilian Amazon." *Forest Ecology and Management* 130, no. 1 (2000): 141-57.

Asner, Gregory P., David E. Knapp, Eben N. Broadbent, Paulo J. C. Oliveira, Michael Keller, and Jose N. Silva. "Selective Logging in the Brazilian Amazon." *Science* 310, no. 5747 (2005): 480-82.

Azevedo-Ramos, Claudia. "Short-Term Effects of Reduced-Impact Logging on Eastern Amazon Fauna." *Forest Ecology and Management* 232, no. 1 (2006): 26-35.

Bernard, Henry, Jon Fjeldså, and Maryati Mohamed. "A Case Study on the Effects of Disturbance and Conversion of Tropical Lowland Rain Forest on the Non-Volant Small Mammals in North Borneo: Management Implications." *Mammal study* 34, no. 2 (2009): 85-96.

Berry, Nicholas J., Oliver L. Phillips, Simon L. Lewis, Jane K. Hill, David P. Edwards, Noel B. Tawatao, Norhayati Ahmad*, et al.* "The High Value of Logged Tropical Forests: Lessons from Northern Borneo." *Biodiversity and Conservation* 19, no. 4 (2010): 985-97.

Berry, Nicholas J., Oliver L. Phillips, Robert C. Ong, and Keith C. Hamer. "Impacts of Selective Logging on Tree Diversity across a Rainforest Landscape: The Importance of Spatial Scale." *Landscape ecology*  (2008).

Bischoff, Wolfgang, David M. Newbery, Marcus Lingenfelder, Rainer Schnaeckel, G. Hubert Petol, Leopold Madani, and Colin E. Ridsdale. "Secondary Succession and Dipterocarp Recruitment in Bornean Rain Forest after Logging." *Forest Ecology and Management* 218, no. 1 (2005): 174-92.

Blanc, Lilian, Marion Echard, Bruno Herault, Damien Bonal, Eric Marcon, Jerome Chave, and Christopher Baraloto. "Dynamics of Aboveground Carbon Stocks in a Selectively Logged Tropical Forest." *Ecological Applications* 19, no. 6 (2009): 1397-404.

Blate, Geoffrey M. "Modest Trade-Offs between Timber Management and Fire Susceptibility of a Bolivian Semi-Deciduous Forest." *Ecological Applications* 15, no. 5 (2005): 1649-63.

Brienen, Roel J. W., and Pieter A. Zuidema. "Incorporating Persistent Tree Growth Differences Increases Estimates of Tropical Timber Yield." *Frontiers in Ecology and the Environment* 5, no. 6 (2007): 302-06.

———. "The Use of Tree Rings in Tropical Forest Management: Projecting Timber Yields of Four Bolivian Tree Species." *Forest Ecology and Management* 226, no. 1 (2006): 256-67.

Brown, Sandra L., Timothy Pearson, Nathan Moore, Aziza Parveen, Stephen Ambagis, and David Shoch. *Impact of Selective Logging on the Carbon Stocks of Tropical Forests: Republic of Congo as a Case Study*. Winrock International, 2005.

Bryan, Jane, Phil Shearman, Julian Ash, and J. B. Kirkpatrick. "Impact of Logging on Aboveground Biomass Stocks in Lowland Rain Forest, Papua New Guinea." *Ecological Applications* 20, no. 8 (2010): 2096-103.

Cannon, Charles H., David R. Peart, and Mark Leighton. "Tree Species Diversity in Commercially Logged Bornean Rainforest." *Science* 281, no. 5381 (1998): 1366-68.

Castro-Arellano, Ivan, Steven J. Presley, Luis Nelio Saldanha, Michael R. Willig, and Joseph M. Wunderle Jr. "Effects of Reduced Impact Logging on Bat Biodiversity in Terra Firme Forest of Lowland Amazonia." *Biological Conservation* 138, no. 1 (2007): 269-85.

Chediack, Sandra E. "Efecto De La Explotación Forestal Sobre La Estructura, Diversidad Y Composición Florística De Los Palmitales De La Selva Atlántica En Misiones, Argentina." *Revista de Biología Tropical* 56, no. 2 (2008): 721-38.

Clarke, F. M., D. V. Pio, and P. A. Racey. "A Comparison of Logging Systems and Bat Diversity in the Neotropics." *Conservation Biology* 19, no. 4 (2005): 1194-204.

Cleary, Daniel F. R. "An Examination of Scale of Assessment, Logging and Enso-Induced Fires on Butterfly Diversity in Borneo." *Oecologia* 135, no. 2 (2003): 313-21.

Cleary, Daniel F. R., and Arne Ø Mooers. "Burning and Logging Differentially Affect Endemic Vs. Widely Distributed Butterfly Species in Borneo." *Diversity and distributions* 12, no. 4 (2006): 409-16.

Condit, Richard, Stephen P. Hubbell, and Robin B. Foster. "Demography and Harvest Potential of Latin American Timber Species: Data from a Large, Permanent Plot in Panama." *Journal of Tropical Forest Science* 7, no. 4 (1995): 599-622.

Costa, Flávia, and William Magnusson. "Selective Logging Effects on Abundance, Diversity, and Composition of Tropical Understory Herbs." *Ecological Applications* 12, no. 3 (2002): 807-19.

Dauber, Erhard, Todd S. Fredericksen, and Marielos Peña. "Sustainability of Timber Harvesting in Bolivian Tropical Forests." *Forest Ecology and Management* 214, no. 1 (2005): 294-304.

Davis, Andrew J. "Does Reduced-Impact Logging Help Preserve Biodiversity in Tropical Rainforests? A Case Study from Borneo Using Dung Beetles (Coleoptera: Scarabaeoidea) as Indicators." *Environmental Entomology* 29, no. 3 (2000): 467-75.

Donovan, Sarah E., Georgianne J. K. Griffiths, Rahman Homathevi, and Linton Winder. "The Spatial Pattern of Soil‐Dwelling Termites in Primary and Logged Forest in Sabah, Malaysia." *Ecological Entomology* 32, no. 1 (2007): 1-10.

Dumbrell, Alex J., and Jane K. Hill. "Impacts of Selective Logging on Canopy and Ground Assemblages of Tropical Forest Butterflies: Implications for Sampling." *Biological Conservation* 125, no. 1 (2005): 123-31.

Edwards, David P., Felicity A. Ansell, Abdul H. Ahmad, Reuben Nilus, and Keith C. Hamer. "The Value of Rehabilitating Logged Rainforest for Birds." *Conservation Biology* 23, no. 6 (2009): 1628-33.

Edwards, David P., Trond H. Larsen, Teegan D. S. Docherty, Felicity A. Ansell, Wayne W. Hsu, Mia A. Derhé, Keith C. Hamer, and David S. Wilcove. "Degraded Lands Worth Protecting: The Biological Importance of Southeast Asia's Repeatedly Logged Forests." *Proceedings of the Royal Society B: Biological Sciences* 278, no. 1702 (2011): 82-90.

Eggleton, Paul, R. Homathevi, D. Jeeva, David T. Jones, Richard G. Davies, and Mohamed Maryati. "The Species Richness and Composition of Termites (Isoptera) in Primary and Regenerating Lowland Dipterocarp Forest in Sabah, East Malaysia." *Ecotropica* 3, no. 2 (1997): 119-28.

Eltz, Thomas. "Spatio-Temporal Variation of Apine Bee Attraction to Honeybaits in Bornean Forests." *Journal of tropical ecology* 20, no. 03 (2004): 317-24.

Felton, Adam, Jeff Wood, Annika M. Felton, Bennett Hennessey, and David B. Lindenmayer. "Bird Community Responses to Reduced-Impact Logging in a Certified Forestry Concession in Lowland Bolivia." *Biological Conservation* 141, no. 2 (2008): 545-55.

Figueira, Adelaine Michela e S., Scott D. Miller, Cleilim Albert D. de Sousa, Mary C. Menton, Augusto R. Maia, Humberto R. da Rocha, and Michael L. Goulden. "Effects of Selective Logging on Tropical Forest Tree Growth." *Journal of Geophysical Research* 113 (2008).

Foody, Giles M., and Mark E. J. Cutler. "Tree Biodiversity in Protected and Logged Bornean Tropical Rain Forests and Its Measurement by Satellite Remote Sensing." *Journal of Biogeography* 30, no. 7 (2003): 1053-66.

Fox, Julian C., Cossey K. Yosi, Patrick Nimiago, Forova Oavika, Joe N. Pokana, Kunsey Lavong, and Rodney J. Keenan. "Assessment of Aboveground Carbon in Primary and Selectively Harvested Tropical Forest in Papua New Guinea." *Biotropica* 42, no. 4 (2010): 410-19.

Ghazoul, Jaboury. "Impact of Logging on the Richness and Diversity of Forest Butterflies in a Tropical Dry Forest in Thailand." *Biodiversity & Conservation* 11, no. 3 (2002): 521-41.

Gourlet-Fleury, Sylvie, Guillaume Cornu, Sébastien Jésel, Hélène Dessard, Jean-Gaël Jourget, Lilian Blanc, and Nicolas Picard. "Using Models to Predict Recovery and Assess Tree Species Vulnerability in Logged Tropical Forests: A Case Study from French Guiana." *Forest Ecology and Management* 209, no. 1 (2005): 69-85.

Graaf, N. R. de. "A Silvicultural System for Natural Regeneration of Tropical Rain Forest in Suriname." *Agricultural University, Wageninigen*  (1986): 250.

Griscom, Bronson, David Ganz, Nicole Virgilio, Fran Price, Jeff Hayward, Rane Cortez, Gary Dodge*, et al.* "The Hidden Frontier of Forest Degradation: A Review of the Science, Policy and Practice of Reducing Degradation Emissions." *The Nature Conservancy, Arlington* 76 (2009).

Grogan, James, Stephen B. Jennings, R. Matthew Landis, Mark Schulze, Anadilza Baima, J. Lopes, Julian M. Norghauer*, et al.* "What Loggers Leave Behind: Impacts on Big-Leaf Mahogany (< I> Swietenia Macrophylla</I>) Commercial Populations and Potential for Post-Logging Recovery in the Brazilian Amazon." *Forest Ecology and Management* 255, no. 2 (2008): 269-81.

Gunawardene, N. R., J. D. Majer, and J. P. Edirisinghe. "Investigating Residual Effects of Selective Logging on Ant Species Assemblages in Sinharaja Forest Reserve, Sri Lanka." *Forest ecology and management* 259, no. 3 (2010): 555-62.

Halme, Panu, Tero Toivanen, Merja Honkanen, Janne S. Kotiaho, Mikko MoeNkkoeNen, and Jonna Timonen. "Flawed Meta-Analysis of Biodiversity Effects of Forest Management." *Conservation biology* 24, no. 4 (2010): 1154-56.

Hamer, K. C., J. K. Hill, S. Benedick, N. Mustaffa, T. N. Sherratt, and M. Maryati. "Ecology of Butterflies in Natural and Selectively Logged Forests of Northern Borneo: The Importance of Habitat Heterogeneity." *Journal of Applied Ecology* 40, no. 1 (2003): 150-62.

Hassall, Mark, Davit T. Jones, Stefano Taiti, Z. Latipi, Stephen L. Sutton, and M. Mohammed. "Biodiversity and Abundance of Terrestrial Isopods Along a Gradient of Disturbance in Sabah, East Malaysia." *European Journal of Soil Biology* 42 (2006): S197-S207.

Hill, J. K., K. C. Hamer, L. A. Lace, and W. M. T. Banham. "Effects of Selective Logging on Tropical Forest Butterflies on Buru, Indonesia." *Journal of Applied Ecology*  (1995): 754-60.

Hobbs, R.J., Higgs, E., Harris, J.A. Novel ecosystems: implications for conservation and restoration. Trends in ecology & evolution 24 (2009), 599-605.

Howard, Andrew F. "A Linear Programming Model for Predicting the Sustainable Yield of Timber from a Community Forest on the Osa Peninsula of Costa Rica." *Forest ecology and management* 61, no. 1 (1993): 29-43.

Huang, M., and G. P. Asner. "Regional Carbon Losses and Recovery Following Selective Logging in the Brazilian Amazon." *Global Biogeochemical Cycles* 24 (2010).

Huth, A., and T. Ditzer. "Long-Term Impacts of Logging in a Tropical Rain Forest—a Simulation Study." *Forest Ecology and Management* 142, no. 1 (2001): 33-51.

Johns, A. D. "Effects of Selective Logging on the Ecological Organization of a Peninsular Malaysian Rainforest Avifauna." *Forktail* 1, no. 6 (1986): 79.

Johns, Andrew D. "Recovery of a Peninsular Malaysian Rainforest Avifauna Following Selective Timber Logging: The First Twelve Years." *Forktail* 4, no. 1989 (1989): 89-105.

Johns, Andrew Grieser. "Bird Population Persistence in Sabahan Logging Concessions." *Biological Conservation* 75, no. 1 (1996): 3-10.

Jones, Martin J., Stuart J. Marsden, and Mark D. Linsley. "Effects of Habitat Change and Geographical Variation on the Bird Communities of Two Indonesian Islands." *Biodiversity & Conservation* 12, no. 5 (2003): 1013-32.

Jonkers, W. B. J. "Vegetation Structure, Logging Damage and Silviculture in a Tropical Rain Forest in Suriname." *Agricultural University, Wageningen*  (1987): 172.

José, Ochoa G. "Efectos De La Extracción De Maderas Sobre La Diversidad De Mamíferos Pequeños En Bosques De Tierras Bajas De La Guayana Venezolana1." *Biotropica* 32, no. 1 (2000): 146-64.

Karsenty, Alain, and Sylvie Gourlet-Fleury. "Assessing Sustainability of Logging Practices in the Congo Basin’s Managed Forests: The Issue of Commercial Species Recovery." *Ecology and Society* 11, no. 1 (2006): 26.

Keller, Michael, Gregory P. Asner, Natalino Silva, and Michael Palace. "Sustainability of Selective Logging in Upland Forests in the Brazilian Amazon." *Working Forests in the Neotropics: Conservation Through Sustainable Management?*  (2004): 41.

Laidlaw, Ruth K. "Effects of Habitat Disturbance and Protected Areas on Mammals of Peninsular Malaysia." *Conservation Biology* 14, no. 6 (2000): 1639-48.

Lambert, F. R. "The Consequences of Selective Logging for Bornean Lowland Forest Birds." *Philosophical Transactions of the Royal Society of London. Series B: Biological Sciences* 335, no. 1275 (1992): 443-57.

Lambert, F. R., and N. J. Collar. "The Future for Sundaic Lowland Forest Birds: Long-Term Effects of Commercial Logging and Fragmentation." *Forktail*  (2002): 127-46.

Lammertink, Martjan. "A Multiple‐Site Comparison of Woodpecker Communities in Bornean Lowland and Hill Forests." *Conservation Biology* 18, no. 3 (2004): 746-57.

Lasco, R. D., K. G. MacDicken, Florencia B. Pulhin, I. Q. Guillermo, Renezita F. Sales, and R. V. O. Cruz. "Carbon Stocks Assessment of a Selectively Logged Dipterocarp Forest and Wood Processing Mill in the Philippines." *Journal of Tropical Forest Science* 18, no. 4 (2006): 212.

Lewis, Owen T. "Effect of Experimental Selective Logging on Tropical Butterflies." *Conservation Biology* 15, no. 2 (2001): 389-400.

Macpherson, Alexander J., Mark D. Schulze, Douglas R. Carter, and Edson Vidal. "A Model for Comparing Reduced Impact Logging with Conventional Logging for an Eastern Amazonian Forest." *Forest ecology and management* 260, no. 11 (2010): 2002-11.

Marsden, Stuart J. "Changes in Bird Abundance Following Selective Logging on Seram, Indonesia." *Conservation Biology* 12, no. 3 (1998): 605-11.

Martinez Higuera, H. A. "Producción De Un Bosque Secundario Sometido a Diferentes Intensidades De Ralco En Turrialba, Costa Rica." UCR/CATIE, 1979.

Mazzei, Lucas, Plinio Sist, Ademir Ruschel, Francis E. Putz, Phidias Marco, Wagner Pena, and Josué Evandro Ribeiro Ferreira. "Above-Ground Biomass Dynamics after Reduced-Impact Logging in the Eastern Amazon." *Forest Ecology and Management* 259, no. 3 (2010): 367-73.

Medjibe, Vincent P., Francis E. Putz, Malcolm P. Starkey, Auguste A. Ndouna, and Hervé R. Memiaghe. "Impacts of Selective Logging on above-Ground Forest Biomass in the Monts De Cristal in Gabon." *Forest Ecology and Management* 262, no. 9 (2011): 1799-806.

Miller, Scott D., Michael L. Goulden, Lucy R. Hutyra, Michael Keller, Scott R. Saleska, Steven C. Wofsy, Adelaine Michela Silva Figueira, Humberto R. da Rocha, and Plinio B. de Camargo. "Reduced Impact Logging Minimally Alters Tropical Rainforest Carbon and Energy Exchange." *Proceedings of the National Academy of Sciences* 108, no. 48 (2011): 19431-35.

Nations, Food, and United Agriculture Organization of the. "Intensive Multiple-Use Forest Management in the Tropics." *FAO For*, no. 55 (1985): 180.

Osenberg, Craig W., Orlando Sarnelle, Scott D. Cooper, and Robert D. Holt. "Resolving Ecological Questions through Meta-Analysis: Goals, Metrics, and Models." *Ecology* 80, no. 4 (1999): 1105-17.

Paillet, Yoan, Laurent Berges, Joakim HjÄLtÉN, Peter Odor, Catherine Avon, Markus Bernhardt‐RÖMermann, Rienk‐Jan Bijlsma*, et al.* "Biodiversity Differences between Managed and Unmanaged Forests: Meta‐Analysis of Species Richness in Europe." *Conservation Biology* 24, no. 1 (2010): 101-12.

Pattanavibool, Anak, and Philip Dearden. "Fragmentation and Wildlife in Montane Evergreen Forests, Northern Thailand." *Biological Conservation* 107, no. 2 (2002): 155-64.

Peña-Claros, Marielos, Todd S. Fredericksen, Alfredo Alarcón, G. M. Blate, U. Choque, C. Leaño, J. C. Licona*, et al.* "Beyond Reduced-Impact Logging: Silvicultural Treatments to Increase Growth Rates of Tropical Trees." *Forest Ecology and Management* 256, no. 7 (2008): 1458-67.

Peña-Claros, M., E. M. Peters, M. J. Justiniano, Fjjm Bongers, Greg M. Blate, T. S. Fredericksen, and F. E. Putz. "Regeneration of Commercial Tree Species Following Silvicultural Treatments in a Moist Tropical Forest." *Forest Ecology and Management* 255, no. 3 (2008): 1283-93.

Phillips, P. D., C. P. De Azevedo, B. Degen, I. S. Thompson, J. N. M. Silva, and P. R. Van Gardingen. "An Individual-Based Spatially Explicit Simulation Model for Strategic Forest Management Planning in the Eastern Amazon." *Ecological Modelling* 173, no. 4 (2004): 335-54.

Pinard, Michelle A., and Francis E. Putz. "Retaining Forest Biomass by Reducing Logging Damage." *Biotropica*  (1996): 278-95.

Presley, Steven J., Michael R. Willig, Joseph M. Wunderle, and Luis Nélio Saldanha. "Effects of Reduced‐Impact Logging and Forest Physiognomy on Bat Populations of Lowland Amazonian Forest." *Journal of Applied Ecology* 45, no. 1 (2008): 14-25.

Rozendaal, Danaë, Claudia C. Soliz-Gamboa, and Pieter A. Zuidema. "Timber Yield Projections for Tropical Tree Species: The Influence of Fast Juvenile Growth on Timber Volume Recovery." *Forest ecology and management* 259, no. 12 (2010): 2292-300.

Rutishauser, Ervan, Fabien Wagner, Bruno Herault, Eric‐André Nicolini, and Lilian Blanc. "Contrasting above‐Ground Biomass Balance in a Neotropical Rain Forest." *Journal of Vegetation Science* 21, no. 4 (2010): 672-82.

Scheffler, Pamela Y. "Dung Beetle (Coleoptera: Scarabaeidae) Diversity and Community Structure across Three Disturbance Regimes in Eastern Amazonia." *Journal of Tropical Ecology* 21, no. 01 (2005): 9-19.

Schulze, Christian H., Matthias Waltert, Paul J. A. Kessler, Ramadhanil Pitopang, Dorthe Veddeler, Michael Mühlenberg, S. Robbert Gradstein*, et al.* "Biodiversity Indicator Groups of Tropical Land-Use Systems: Comparing Plants, Birds, and Insects." *Ecological Applications* 14, no. 5 (2004): 1321-33.

Schulze, Mark. "Ecology and Behavior of Nine Timber Species in Para Brazil: Links between Species Life History and Forest Management and Conservation." The Pennsylvania State University, 2003.

———. "Technical and Financial Analysis of Enrichment Planting in Logging Gaps as a Potential Component of Forest Management in the Eastern Amazon." *Forest Ecology and Management* 255, no. 3-4 (2008): 866-79.

Schulze, Mark, James Grogan, R. Matthew Landis, and Edson Vidal. "How Rare Is Too Rare to Harvest?: Management Challenges Posed by Timber Species Occurring at Low Densities in the Brazilian Amazon." *Forest Ecology and Management* 256, no. 7 (2008): 1443-57.

Schulze, Mark D. "Ecology and Behavior of Nine Timber Tree Species in Pará, Brazil: Links between Species Life History and Forest Management and Conservation." Pennsylvania State University, 2003.

Sebbenn, Alexandre M., Bernd Degen, Vânia C. R. Azevedo, Marivana B. Silva, André E. B. de Lacerda, Ana Y. Ciampi, Milton Kanashiro*, et al.* "Modelling the Long-Term Impacts of Selective Logging on Genetic Diversity and Demographic Structure of Four Tropical Tree Species in the Amazon Forest." *Forest ecology and management* 254, no. 2 (2008): 335-49.

Sekercioglu, Cagan H. "Effects of Forestry Practices on Vegetation Structure and Bird Community of Kibale National Park, Uganda." *Biological Conservation* 107, no. 2 (2002): 229-40.

Silva, Jose N. M., J. O. P. de de Carvalho, Jdca Lopes, B. F. De Almeida, D. H. M. Costa, L. C. de de Oliveira, Jerome K. Vanclay, and J. P. Skovsgaard. "Growth and Yield of a Tropical Rain Forest in the Brazilian Amazon 13 Years after Logging." *Forest ecology and management* 71, no. 3 (1995): 267-74.

Sist, Plinio, Robert Fimbel, Douglas Sheil, Robert Nasi, and Marie-Hélène Chevallier. "Towards Sustainable Management of Mixed Dipterocarp Forests of South-East Asia : Moving Beyon Minimum Diameter Cutting Limits." *Environmental conservation* 30, no. 4 (2003): 364-74.

Sist, Plinio, and Nicolas Nguyen-The. "Logging Damage and the Subsequent Dynamics of a Dipterocarp Forest in East Kalimantan (1990-1996)." *Forest ecology and management* 165 (2002): 85-103.

Sist, Plinio, T. Nolan, Jean-Guy Bertault, and Dennis P. Dykstra. "Harvesting Intensity Versus Sustainability in Indonesia." *Forest Ecology and Management* 108 (1998): 251-60.

Sist, Plinio, Douglas Sheil, Kuswata Kartawinata, and Hari Priyadi. "Reduced-Impact Logging in Indonesian Borneo : Some Results Confirming the Need for New Silvicultural Prescriptions." *Forest ecology and management* 179 (2003): 415-27.

Slik, J. W. Ferry, Rene W. Verburg, and Paul Ja KeßLer. "Effects of Fire and Selective Logging on the Tree Species Composition of Lowland Dipterocarp Forest in East Kalimantan, Indonesia." *Biodiversity & Conservation* 11, no. 1 (2002): 85-98.

Smythe, N. "Competition and Resource Partitioning in the Guild of Neotropieal, Terrestrial, Frugivorous Mammals." *Ann. Rev. Ecol. Syst.*, no. 17 (1986): 169-88.

Sodhi, Navjot S., Lian Pin Koh, Dewi M. Prawiradilaga, Idris Tinulele, Dadang Dwi Putra, and Tommy Han Tong Tan. "Land Use and Conservation Value for Forest Birds in Central Sulawesi (Indonesia)." *Biological Conservation* 122, no. 4 (2005): 547-58.

Sodhi, Navjot S., Tien Ming Lee, Lian Pin Koh, and Barry W. Brook. "A Meta‐Analysis of the Impact of Anthropogenic Forest Disturbance on Southeast Asia's Biotas." *Biotropica* 41, no. 1 (2009): 103-09.

Sodhi, Navjot S., Malcolm Ck Soh, Dewi M. Prawiradilaga, and Barry W. Brook. "Persistence of Lowland Rainforest Birds in a Recently Logged Area in Central Java." *Bird Conservation International* 15, no. 02 (2005): 173-91.

Somarriba Chaves, E. "Dinamica De La Poblacion De Goethalsia Meiantha (J. Donn. Smith) Burrett on Un Bosque Tropical Secundario." UCR/CATIE, 1984.

Stanley, S. "Preliminary Biomass Estimate in Pt. Mamberamo Alas Mandiri Concession Papua, Indonesia." Washington, D.C.: Report for Conservation International, 2009.

Styring, A. Robinson, and Kalan Ickes. "Woodpecker Abundance in a Logged (40 Years Ago) Vs. Unlogged Lowland Dipterocarp Forest in Peninsular Malaysia." *Journal of Tropical Ecology* 17, no. 02 (2001): 261-68.

Taylor, B. W. "Estudios Ecológicos Para El Aprovechamiento De La Tierra En Nicaragua." In *FAO*, 338. Rome, 1959.

Thiollay, Jean-Marc. "Disturbance, Selective Logging and Bird Diversity: A Neotropical Forest Study." *Biodiversity & Conservation* 6, no. 8 (1997): 1155-73.

Turner, I. M., Y. K. Wong, P. T. Chew, and Ali bin Ibrahim. "Tree Species Richness in Primary and Old Secondary Tropical Forest in Singapore." *Biodiversity & Conservation* 6, no. 4 (1997): 537-43.

Valle, Denis, Paul Phillips, Edson Vidal, Mark Schulze, James Grogan, Márcio Sales, and Paul van Gardingen. "Adaptation of a Spatially Explicit Individual Tree-Based Growth and Yield Model and Long-Term Comparison between Reduced-Impact and Conventional Logging in Eastern Amazonia, Brazil." *Forest Ecology and Management* 243, no. 2 (2007): 187-98.

Valle, Denis, Mark Schulze, Edson Vidal, James Grogan, and Marcio Sales. "Identifying Bias in Stand-Level Growth and Yield Estimations: A Case Study in Eastern Brazilian Amazonia." *Forest Ecology and Management* 236, no. 2 (2006): 127-35.

Van Gardingen, P. R., M. J. McLeish, P. D. Phillips, Dadang Fadilah, G. Tyrie, and I. Yasman. "Financial and Ecological Analysis of Management Options for Logged-over Dipterocarp Forests in Indonesian Borneo." *Forest Ecology and Management* 183, no. 1 (2003): 1-29.

van Gardingen, Paul R., Denis Valle, and Ian Thompson. "Evaluation of Yield Regulation Options for Primary Forest in Tapajos National Forest, Brazil." *Forest Ecology and Management* 231, no. 1 (2006): 184-95.

Vanclay, Jerome K. "Sustainable Timber Harvesting: Simulation Studies in the Tropical Rainforests of North Queensland." *Forest Ecology and Management* 69, no. 1 (1994): 299-320.

Vasconcelos, H. L., J. M. S. Vilhena, and G. J. A. Caliri. "Responses of Ants to Selective Logging of a Central Amazonian Forest." *Journal of Applied Ecology* 37, no. 3 (2000): 508-14.

Waltert, Matthias, Ani Mardiastuti, and Michael Mühlenberg. "Effects of Deforestation and Forest Modification on Understorey Birds in Central Sulawesi, Indonesia." *Bird Conservation International* 15, no. 03 (2005): 257-73.

Webb, Edward L., and Rodolfo Peralta. "Tree Community Diversity of Lowland Swamp Forest in Northeast Costa Rica, and Changes Associated with Controlled Selective Logging." *Biodiversity & Conservation* 7, no. 5 (1998): 565-83.

Wells, Konstans, Lesley R. Smales, Elisabeth K. V. Kalko, and Martin Pfeiffer. "Impact of Rain-Forest Logging on Helminth Assemblages in Small Mammals (Muridae, Tupaiidae) from Borneo." *Journal of Tropical Ecology* 23, no. 01 (2007): 35-43.

Whitman, Andrew A., John M. Hagan, and Nicholas V. L. Brokaw. "Effects of Selection Logging on Birds in Northern Belize1." *Biotropica* 30, no. 3 (1998): 449-57.

Widodo, Erwin S., Tikahiko Naito, Maryati Mohamed, and Yoshiaki Hashimoto. "Effects of Selective Logging on the Arboreal Ants of a Bornean Rainforest." *Entomological Science* 7, no. 4 (2004): 341-49.

Willott, S. J., D. C. Lim, S. G. Compton, and S. L. Sutton. "Effects of Selective Logging on the Butterflies of a Bornean Rainforest." *Conservation Biology* 14, no. 4 (2000): 1055-65.

Willottf, S. J. "The Effects of Selective Logging on the Distribution of Moths in a Bornean Rainforest." *Philosophical Transactions of the Royal Society of London. Series B: Biological Sciences* 354, no. 1391 (1999): 1783-90.

Wong, Marina. "Trophic Organization of Understory Birds in a Malaysian Dipterocarp Forest." *The Auk*  (1986): 100-16.

Woodcock, Paul, David P. Edwards, Tom M. Fayle, Rob J. Newton, Chey Vun Khen, Simon H. Bottrell, and Keith C. Hamer. "The Conservation Value of South East Asia's Highly Degraded Forests: Evidence from Leaf-Litter Ants." *Philosophical Transactions of the Royal Society B: Biological Sciences* 366, no. 1582 (2011): 3256-64.

Wunderle, Joseph M., Luiza Magalli Pinto Henriques, and Michael R. Willig. "Short‐Term Responses of Birds to Forest Gaps and Understory: An Assessment of Reduced‐Impact Logging in a Lowland Amazon Forest1." *Biotropica* 38, no. 2 (2006): 235-55.

Yap, Charlotte A. M., Navjot S. Sodhi, Kelvin S. H. Peh, and J. H. Vega Rivera. "Phenology of Tropical Birds in Peninsular Malaysia: Effects of Selective Logging and Food Resources." *The Auk* 124, no. 3 (2007): 945-61.
